# Supplementary material for: Short Lifespans of Memory T-cells in Bone Marrow, Blood, and Lymph Nodes Suggest That T-cell Memory Is Maintained by Continuous Self-Renewal of Recirculating Cells
Source: PubMed Central journal article supplement (PMC6141715; doi:10.3389/fimmu.2018.02054), 2018-09-11
Supplement: Data_Sheet_1.pdf [file Data_Sheet_1.pdf]

## *Supplementary Material*

### **Short lifespans of memory T-cells in bone marrow, blood and lymph nodes suggest that T-cell memory is maintained by continuous self-renewal of recirculating cells**

**Mariona Baliu-Piqué, Myrddin Verheij, Julia Drylewicz, Lars Ravesloot, Rob J. de Boer, Ad Koets<sup>#</sup>, Kiki Tesselaar<sup>#</sup>, José A.M. Borghans<sup>\*#</sup>**

<sup>#</sup> These authors contributed equally to this work

**\* Correspondence:**

J.A.M. Borghans

J.Borghans@umcutrecht.nl

#### **1 Supplementary Figures and Tables**

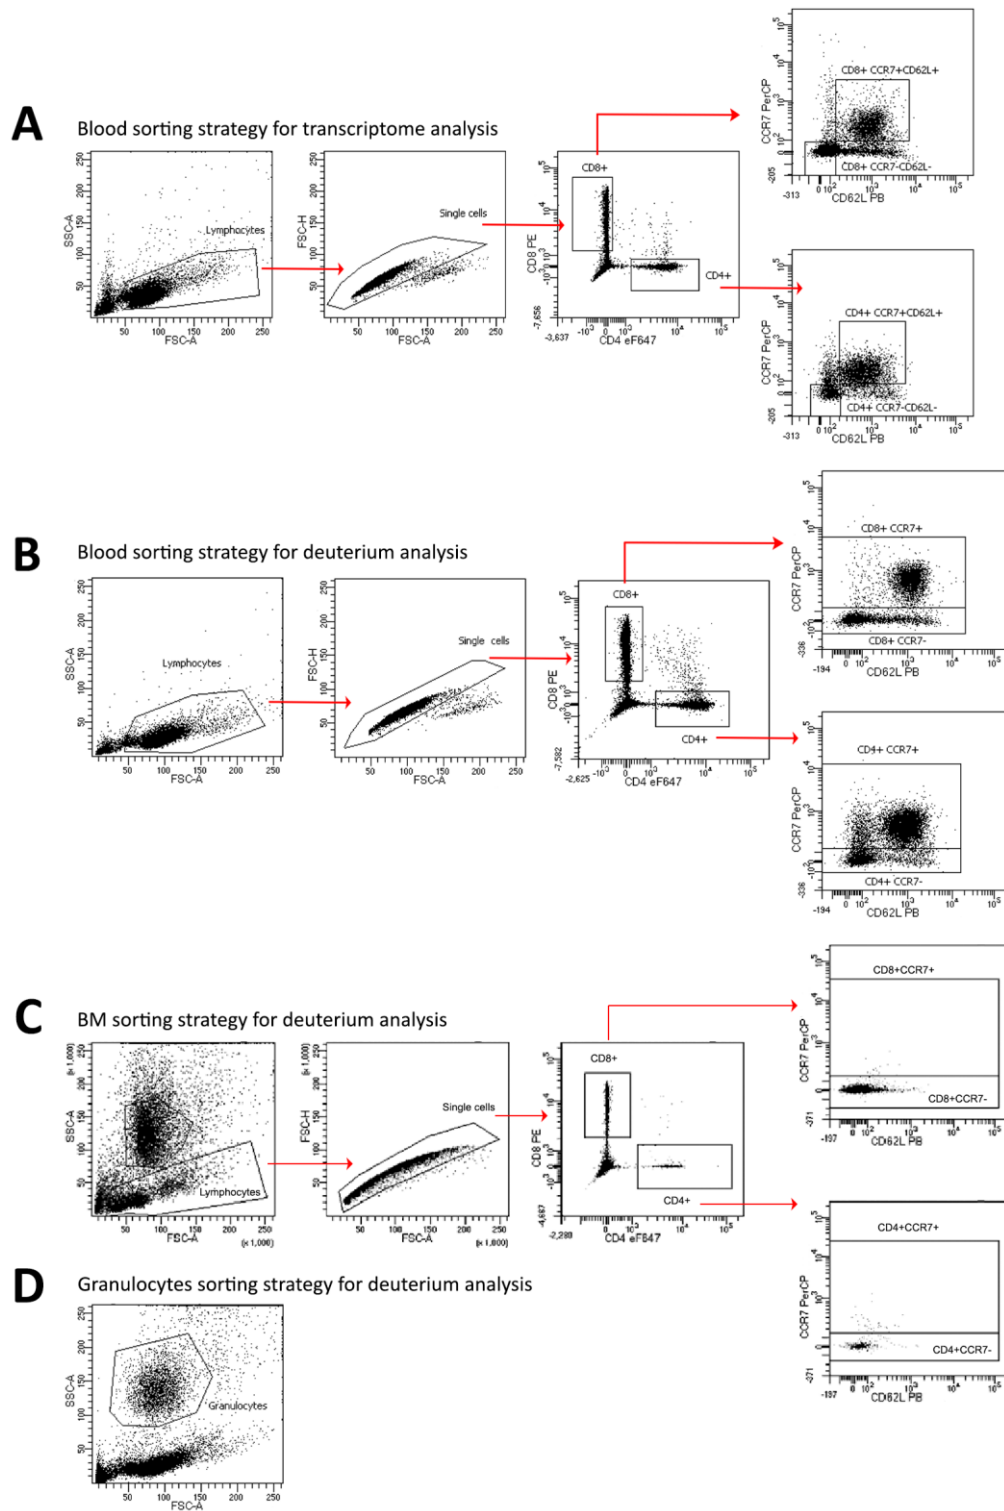

**Sup. Figure 1. Sorting strategy for (A) transcriptome analysis, for deuterium enrichment analysis of (B) T-cells from blood, (C) T-cells from BM, and (D) granulocytes from blood.**

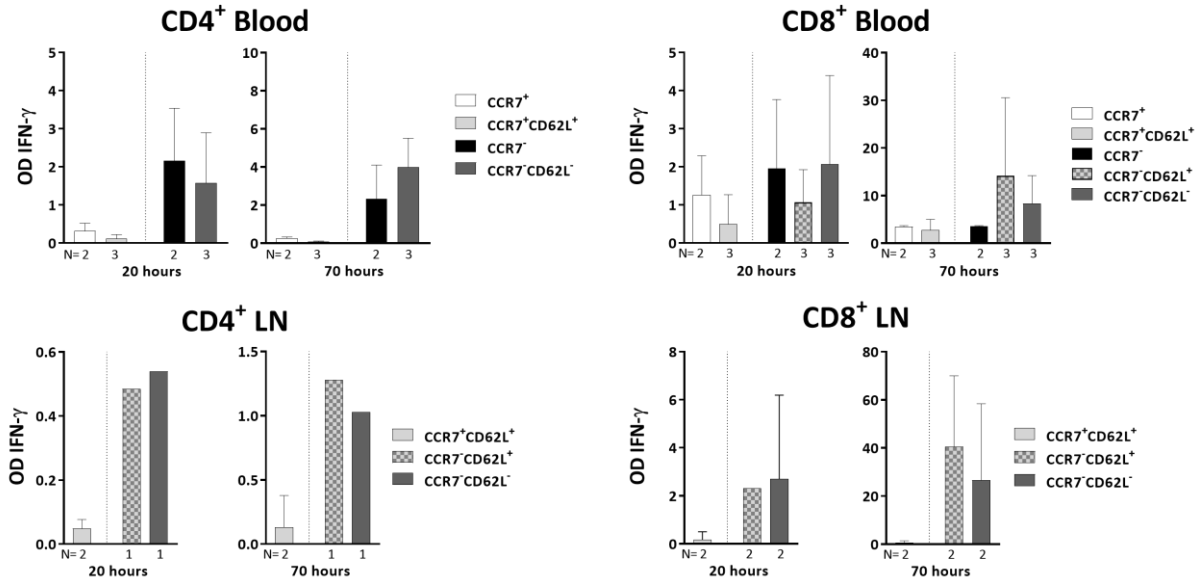

**Sup. Figure 2. CCR7<sup>-</sup> (memory) T-cells produce higher IFN- $\gamma$  than CCR7<sup>+</sup> (naive) T-cells.** Median IFN- $\gamma$  production for sorted CD4<sup>+</sup> and CD8<sup>+</sup> CCR7<sup>+</sup>CD62L<sup>+</sup> (DP-N), CCR7<sup>-</sup>CD62L<sup>+</sup>, CCR7<sup>-</sup>CD62L<sup>-</sup> (DN-M), CCR7<sup>+</sup> (naive) and CCR7<sup>-</sup> (memory) T-cells from blood and LN stimulated for 20 and 70 hours with PMA/ionomycin. IFN- $\gamma$  production is shown as the OD of stimulated samples minus the OD of background. Error bars represent ranges. N=1-3.

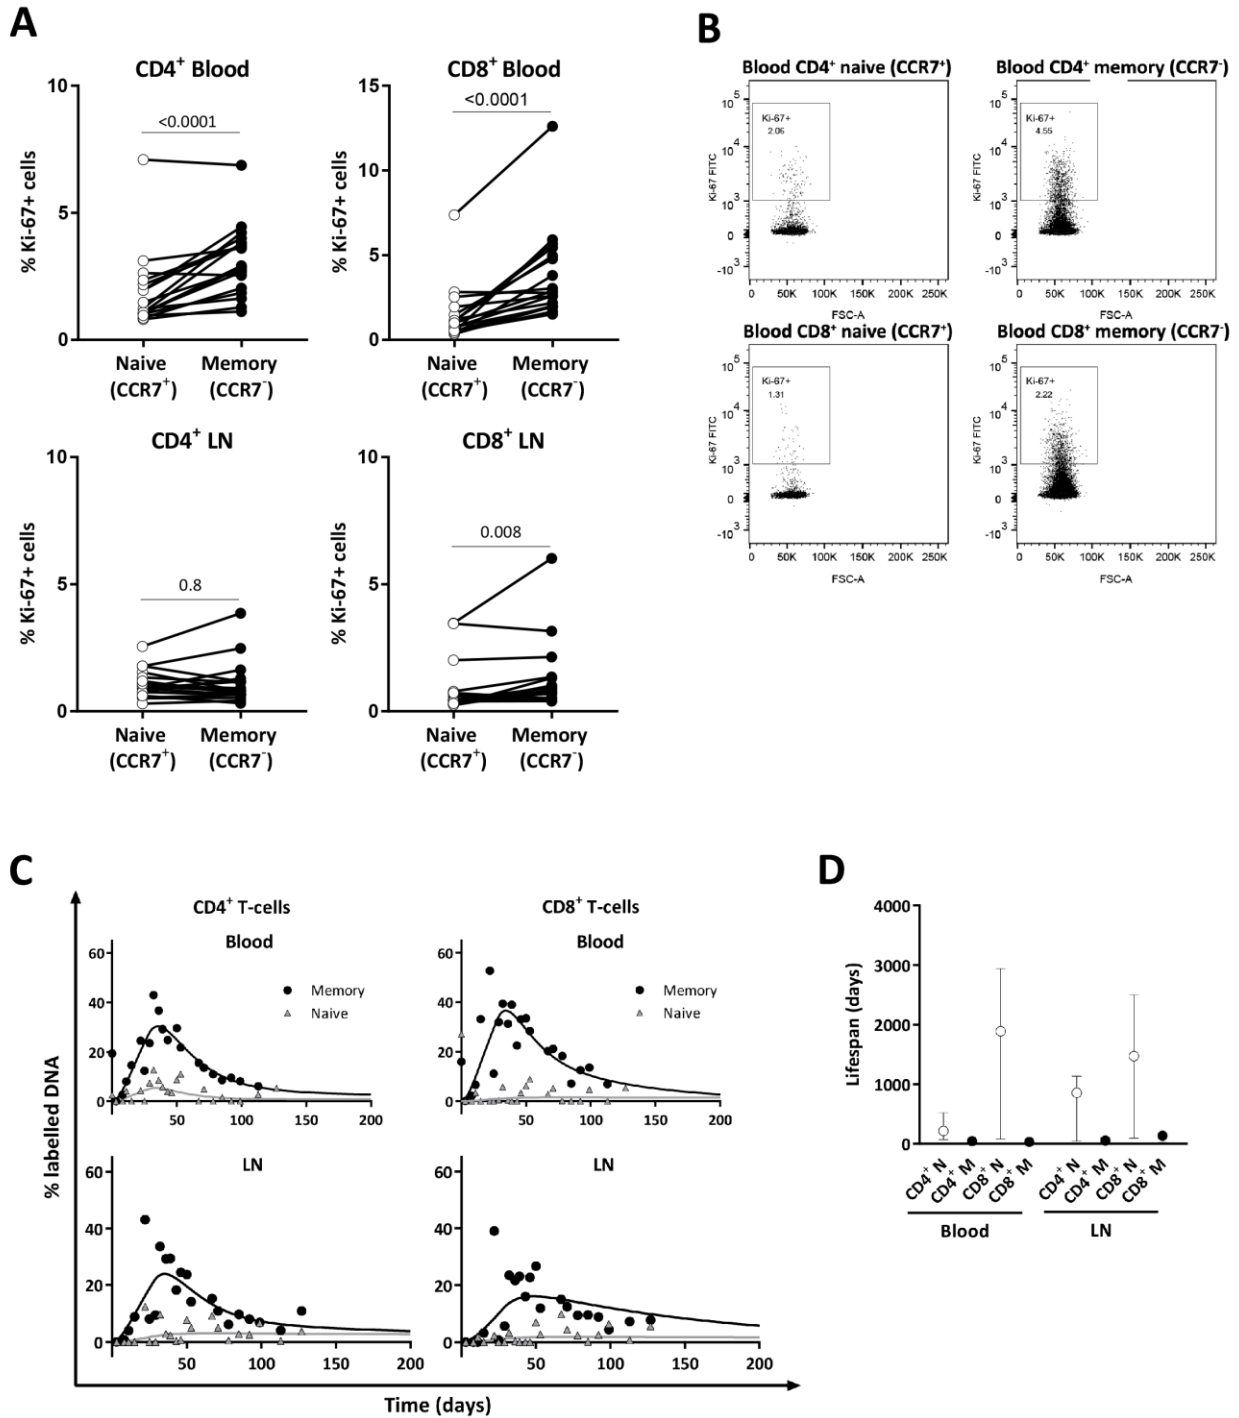

**Sup. Figure 3. Memory T-cells (CCR7<sup>-</sup>) have higher percentage of Ki-67 positive cells and reach higher deuterium enrichment than naive T-cells (CCR7<sup>+</sup>).** (A) Percentage Ki-67 positive cells in memory and naive CD4<sup>+</sup> and CD8<sup>+</sup> T-cells from blood and LN. Samples were compared using the Wilcoxon signed-rank test, p-values are shown. (B) Intracellular Ki-67 staining of CD4<sup>+</sup> and CD8<sup>+</sup> memory (CCR7<sup>-</sup>) and naive (CCR7<sup>+</sup>) T-cells from blood of a

representative goat. **(C)** Best fits to the level of deuterium enrichment measured in the DNA of  $CD4^+$  and  $CD8^+$  memory ( $CCR7^-$ ) and naive ( $CCR7^+$ ) T-cells from blood and LN. Label enrichment in the DNA was scaled between 0 and 100% by normalizing to the maximum enrichment in granulocytes (See material and methods). Data for memory T-cells (black dots) is also shown in Figure 3 and Figure 4. **(D)** Estimated lifespans in days of  $CD4^+$  and  $CD8^+$  memory ( $CCR7^-$ ) and naive ( $CCR7^+$ ) T-cells from blood and LN, and their respective 95% confidence limits.

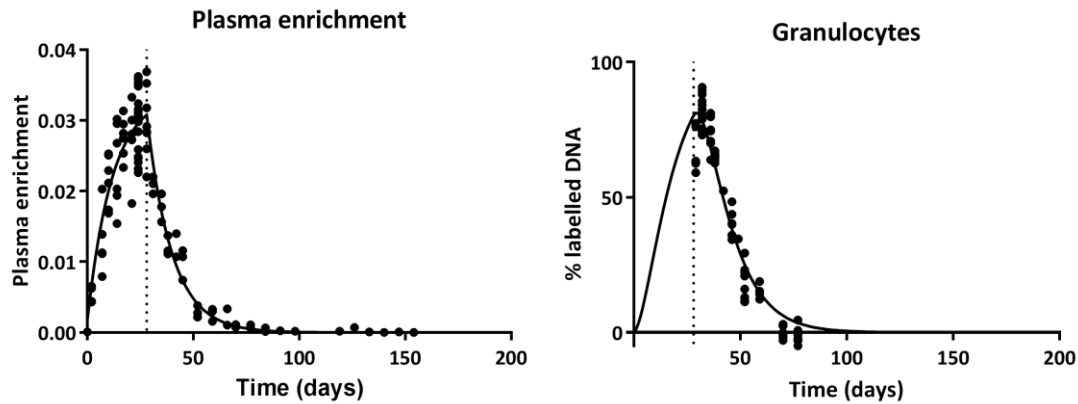

**Sup. Figure 4. Best fit of the deuterium enrichment in plasma and granulocytes.** Symbols represent individual measurements during the up- and down-labelling phases. Granulocytes were used to normalize the data (see material and methods). Parameter estimates for the best fit are given in Sup. Table 1.

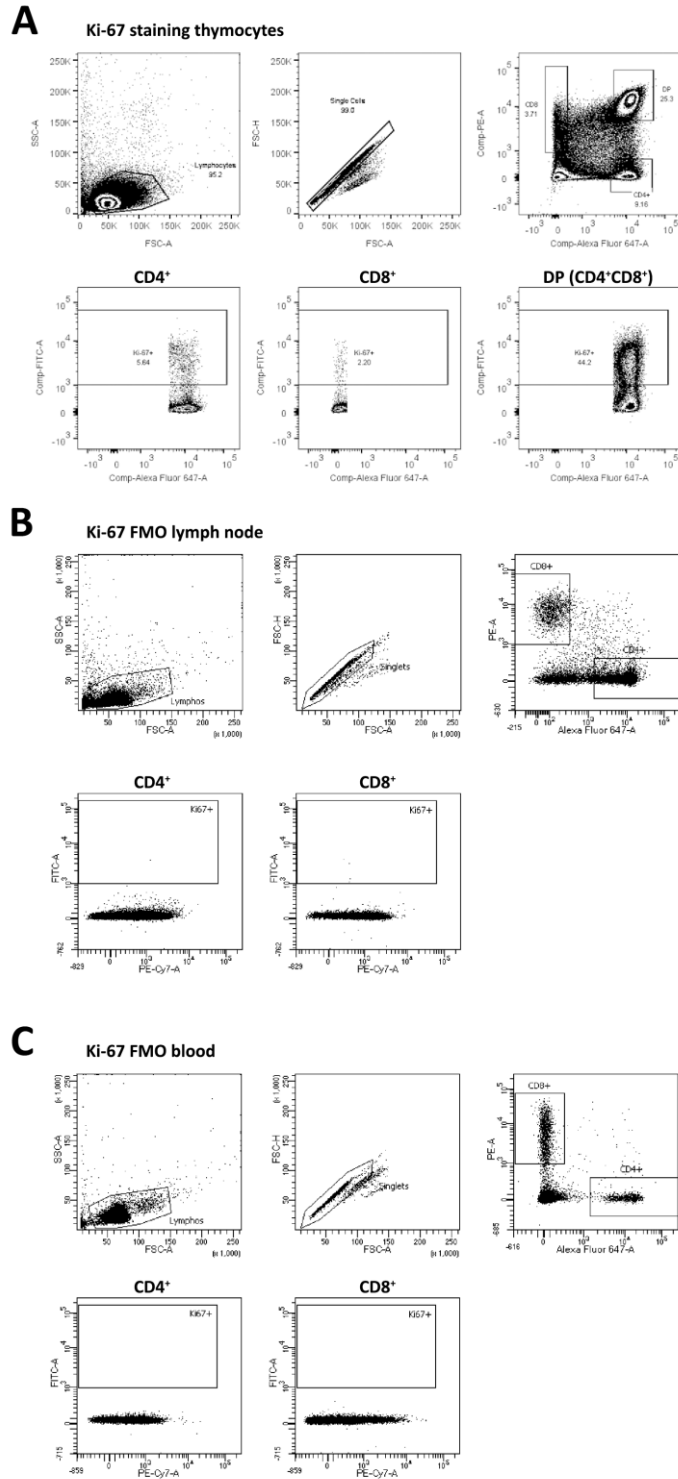

**Sup. Figure 5. Positive and negative controls for intracellular Ki-67 staining.** (A) Intracellular Ki-67 staining of CD4<sup>+</sup>, CD8<sup>+</sup> and double positive (CD4<sup>+</sup>CD8<sup>+</sup>) thymocytes of a representative goat. (B and C) Ki-67 fluorescence minus one (FMO) staining of CD4<sup>+</sup>, CD8<sup>+</sup> cells from LN and blood of a representative goat.

**Sup. Table 1. Estimates for deuterium enrichment in plasma and granulocytes.**

|                     | Parameter | Estimate (95% confidence limits) |
|---------------------|-----------|----------------------------------|
| <b>Plasma</b>       | $\delta$  | 0.08433 (0.07486;0.09649)        |
|                     | $f$       | 0.03381 (0.03184;0.03501)        |
| <b>Granulocytes</b> | $c$       | 4.42 (4.39;4.66)                 |

**Sup. Table 2. Average turnover rate per day for CD4<sup>+</sup> and CD8<sup>+</sup> T-cells from blood, BM and LN.**

|              | Average turnover rate (95% confidence limits)  |                                               |                                                |                                               |
|--------------|------------------------------------------------|-----------------------------------------------|------------------------------------------------|-----------------------------------------------|
|              | CD4 <sup>+</sup> CCR7 <sup>-</sup><br>(memory) | CD4 <sup>+</sup> CCR7 <sup>+</sup><br>(naive) | CD8 <sup>+</sup> CCR7 <sup>-</sup><br>(memory) | CD8 <sup>+</sup> CCR7 <sup>+</sup><br>(naive) |
| <b>Blood</b> | 0.0227<br>(0.0129;0.0374)                      | 0.0047<br>(0.0019;0.0146)                     | 0.0308<br>(0.0173;0.2008)                      | 0.0005<br>(0.0003;0.0121)                     |
| <b>BM</b>    | 0.0199<br>(0.011;0.0466)                       | ND                                            | 0.0184<br>(0.0104;0.1340)                      | ND                                            |
| <b>LN</b>    | 0.0186<br>(0.0102;0.0359)                      | 0.0012<br>(0.0009;0.0245)                     | 0.0074 (0.0054;<br>0.0582)                     | 0.0007<br>(0.0004;0.0106)                     |

ND: not determined

**Sup. Table 3. Differentially expressed genes**

| CD4 <sup>+</sup> T-cells Memory vs Naive |                 |              |                                                                                                                         |
|------------------------------------------|-----------------|--------------|-------------------------------------------------------------------------------------------------------------------------|
| Gene Name                                | Log fold change | adj. P value | Literature                                                                                                              |
| ADARB1                                   | -2.54915        | 0.002391     | (Grigoryev et al., 2011)                                                                                                |
| ADARB1                                   | -2.46267        | 0.003752     |                                                                                                                         |
| BACH2                                    | -1.87584        | 0.008572     | (Hu & Chen, 2013a)                                                                                                      |
| BACH2                                    | -1.56094        | 0.041767     |                                                                                                                         |
| BMP4                                     | -1.10496        | 0.016446     | (Martínez et al., 2015)                                                                                                 |
| CADM1                                    | -2.9022         | 0.007051     | (Yeh, Sidhu, & Chan, 2008a)                                                                                             |
| CADM1                                    | -2.88951        | 0.002837     |                                                                                                                         |
| CADM1                                    | -2.82384        | 0.004798     |                                                                                                                         |
| CADM1                                    | -2.77005        | 0.006469     |                                                                                                                         |
| CADM1                                    | -2.67598        | 0.006251     |                                                                                                                         |
| CADM1                                    | -2.67318        | 0.005128     |                                                                                                                         |
| CCR4                                     | 1.991457        | 0.011533     | (Marshall et al., 2011a)                                                                                                |
| CCR7                                     | -2.40471        | 0.00941      | (Marshall et al., 2011b; Sallusto, Geginat, & Lanzavecchia, 2004; Sallusto, Lenig, Förster, Lipp, & Lanzavecchia, 1999) |
| CHST11                                   | 1.943514        | 0.031714     | (Hu & Chen, 2013b)                                                                                                      |
| CRLF2                                    | 1.39184         | 0.043779     | (Mitchell et al., 2015)                                                                                                 |
| DLG4                                     | -1.57907        | 0.014365     | (Ludford-Menting et al., 2005)                                                                                          |
| DLG4                                     | -1.40352        | 0.048212     |                                                                                                                         |
| ERN1                                     | 1.433865        | 0.007051     | (Brinza et al., 2016a)                                                                                                  |
| FLNB                                     | -1.43322        | 0.034901     | (Ishihara et al., 2015)                                                                                                 |
| FLNB                                     | -1.40762        | 0.021134     |                                                                                                                         |
| FLNB                                     | -1.36113        | 0.034838     |                                                                                                                         |
| FLNB                                     | -1.30816        | 0.027905     |                                                                                                                         |
| GHR                                      | 1.348845        | 0.000174     | (Spadaro et al., 2016)                                                                                                  |

|                                                |                 |              |                                                          |
|------------------------------------------------|-----------------|--------------|----------------------------------------------------------|
| GHR                                            | 1.387197        | 0.000179     |                                                          |
| GHR                                            | 1.424572        | 0.000174     |                                                          |
| GHR                                            | 1.451081        | 0.00044      |                                                          |
| GHR                                            | 1.670101        | 0.000159     |                                                          |
| HNRNPLL                                        | 1.1555          | 0.041836     | (Zuopeng Wu et al., 2008)                                |
| HNRNPLL                                        | 1.330412        | 0.010945     |                                                          |
| IL17RB                                         | 1.825036        | 0.003655     | (Lavorogna, Matsuoka, & Harhaj, 2014; Wang et al., 2006) |
| IL17RB                                         | 1.967296        | 0.003752     |                                                          |
| IL4                                            | 1.788038        | 0.00938      | (Romagnani, 1992)                                        |
| OTUD7A                                         | -1.57246        | 0.00022      | (Zuopeng Wu et al., 2008)                                |
| PDK1                                           | -1.86132        | 0.040798     | (Park et al., 2009)                                      |
| PELI3                                          | -1.3658         | 0.008258     | (W. Jin, Chang, & Sun, 2012)                             |
| PELI3                                          | -1.00036        | 0.037282     |                                                          |
| PLD2                                           | 1.443367        | 0.007889     | (Chandrasekaran, 2010)                                   |
| PTPN13                                         | 1.222311        | 0.048712     |                                                          |
| PTPN13                                         | 1.228839        | 0.03175      |                                                          |
| PTPN13                                         | 1.269886        | 0.015939     |                                                          |
| PTPN13                                         | 1.273159        | 0.038463     | (Stanford, Rapini, & Bottini, 2012)                      |
| PTPN13                                         | 1.404583        | 0.008258     |                                                          |
| PTPN13                                         | 1.417017        | 0.039764     |                                                          |
| PTPN13                                         | 1.428352        | 0.048029     |                                                          |
| RUNX2                                          | 2.464744        | 0.019147     |                                                          |
| RUNX2                                          | 2.478845        | 0.03852      | (Hu & Chen, 2013b)                                       |
| RUNX2                                          | 2.547863        | 0.021134     |                                                          |
| SI00A11                                        | 1.207338        | 0.048574     | (Haining et al., 2008)                                   |
| SELL                                           | -2.83203        | 0.006251     | (Sallusto et al., 2004, 1999)                            |
| SOX4                                           | -2.04995        | 0.046482     | (Hu & Chen, 2013b)                                       |
| TRPC3                                          | -1.69726        | 0.001252     | (Wenning et al., 2011)                                   |
| ZBTB16                                         | 1.739579        | 0.048029     | (Zhang, Laouar, Denzin, & Sant'Angelo, 2015)             |
| ZBTB16                                         | 1.965289        | 0.021788     |                                                          |
| ZBTB44                                         | -1.02269        | 0.041767     | (Bhattacharyya et al., 2017)                             |
| <b>CD8<sup>+</sup> T-cells Memory vs Naive</b> |                 |              |                                                          |
| Gene Name                                      | Log fold change | adj. P value | Literature                                               |
| ACTN1                                          | -2.02701        | 0.004779     | (Lee, Hanspers, Barker, Korn, & McCune, 2004)            |
| ACTN1                                          | -2.01951        | 0.006649     |                                                          |
| ACTN1                                          | -1.98664        | 0.006654     |                                                          |
| ADA                                            | -1.44861        | 0.04267      | (Martinez-Navio et al., 2011)                            |
| ADA                                            | -1.38588        | 0.047133     |                                                          |
| ADRB2                                          | 2.03203         | 0.020589     | (Slova, Shi, Chen, Bevans, & Weng, 2015)                 |
| ANXA6                                          | -1.47009        | 0.024847     | (Wong, Chen, Wu, Liu, & Zheng, 2015)                     |
| ANXA6                                          | -1.62705        | 0.038457     |                                                          |
| ATP1B3                                         | 1.17328         | 0.019913     | (Arsenio et al., 2014)                                   |
| BACH2                                          | -1.78332        | 0.00667      | (Hu & Chen, 2013b)                                       |
| BACH2                                          | -1.73338        | 0.011494     |                                                          |
| BCL2L11                                        | 1.848809        | 0.017825     | (Wojciechowski et al., 2007)                             |
| BCL2L11                                        | 1.740505        | 0.027247     |                                                          |
| BCL2L11                                        | 1.730477        | 0.028292     |                                                          |
| BCL2L11                                        | 1.678561        | 0.030738     |                                                          |
| BCL2L11                                        | 1.678507        | 0.032155     |                                                          |
| CADM1                                          | -2.3757         | 0.006235     | (Yeh, Sidhu, & Chan, 2008b)                              |
| CADM1                                          | -2.34733        | 0.006582     |                                                          |
| CADM1                                          | -2.49651        | 0.006754     |                                                          |
| CADM1                                          | -2.63067        | 0.007128     |                                                          |
| CADM1                                          | -2.37436        | 0.007607     |                                                          |
| CADM1                                          | -2.29788        | 0.008732     |                                                          |
| CAMK2G                                         | 1.0616          | 0.003486     | (Lin et al., 2005)                                       |
| CAMK2G                                         | 1.066896        | 0.004779     |                                                          |
| CAMK2G                                         | 1.031444        | 0.005023     |                                                          |
| CAMK2G                                         | 1.039734        | 0.005316     |                                                          |
| CAMK2G                                         | 1.048958        | 0.006235     |                                                          |
| CAMK2G                                         | 1.093162        | 0.006939     |                                                          |
| CAMK2G                                         | 1.07089         | 0.008791     |                                                          |
| CAMK2G                                         | 1.027993        | 0.008791     |                                                          |
| CAMK2G                                         | 1.005068        | 0.010375     |                                                          |
| CCR7                                           | -3.89792        | 0.000567     | (Sallusto et al., 2004, 1999)                            |



|         |          |          |                                                          |
|---------|----------|----------|----------------------------------------------------------|
| CD244   | 2.277336 | 0.020215 | (Weng, Araki, & Subedi, 2012)                            |
| CD244   | 2.277336 | 0.020215 |                                                          |
| CD2AP   | -1.25602 | 0.045375 | (Bachmann, Barner, & Kopf, 1999)                         |
| CD2AP   | -1.44232 | 0.046136 |                                                          |
| CD58    | 0.746696 | 0.029956 | (Weng et al., 2012)                                      |
| CRACR2A | 1.459777 | 0.048532 | (Srikanth et al., 2017)                                  |
| CTLA4   | -2.31751 | 0.031419 | (Jago, Yates, Saraiva Câmara, Lechler, & Lombardi, 2004) |
| EFHD2   | 1.436447 | 0.006198 | (Haining et al., 2008)                                   |
| FOSL2   | 1.658675 | 0.03285  | (Hu & Chen, 2013b)                                       |
| GZMA    | 2.722409 | 0.022504 | (Haining et al., 2008)                                   |
| GZMA    | 2.722409 | 0.022504 |                                                          |
| HDAC7   | -1.27734 | 0.008732 | (Myers et al., 2017)                                     |
| HDAC7   | -1.29071 | 0.009377 |                                                          |
| HDAC7   | -1.2653  | 0.011898 |                                                          |
| HDAC7   | -1.29661 | 0.012247 |                                                          |
| HDAC7   | -1.2668  | 0.012397 |                                                          |
| HDAC7   | -1.23558 | 0.012807 |                                                          |
| HDAC7   | -1.24396 | 0.017282 |                                                          |
| IFNARI  | -1.08905 | 0.044404 | (Arsenio et al., 2014)                                   |
| IL12RB2 | 2.074168 | 0.031711 | (Cleary et al., 2003)                                    |
| IL21R   | -1.70319 | 0.030678 | (Zheng Wu et al., 2005)                                  |
| IL21R   | -1.69447 | 0.034067 |                                                          |
| IL6ST   | -2.01471 | 0.029956 | (Marshall et al., 2011b)                                 |
| IL7R    | -1.49989 | 0.034417 | (Arsenio et al., 2014; Holmes, He, Xu, & Lee, 2005)      |
| ITGA1   | -1.54763 | 0.032364 | (Brinza et al., 2016b)                                   |
| ITGAL   | 1.643297 | 0.042275 | (Wong et al., 2015)                                      |
| ITGAL   | 1.723651 | 0.045776 |                                                          |
| ITGB2   | 1.439598 | 0.021548 | (Wong et al., 2015)                                      |
| ITGB2   | 1.421697 | 0.023959 |                                                          |
| LEF1    | -3.80763 | 0.001203 | (Willinger et al., 2006)                                 |
| LEF1    | -3.83547 | 0.001302 |                                                          |
| LEF1    | -3.91898 | 0.001697 |                                                          |
| LEF1    | -3.63355 | 0.002435 |                                                          |
| MYC     | -1.86997 | 0.012247 | (Wong et al., 2015)                                      |
| MYC     | -1.88266 | 0.012721 |                                                          |
| NKG7    | 1.404262 | 0.025862 | (Jenner et al., 2009)                                    |
| OTUD7A  | -1.42095 | 0.000921 | (Zuopeng Wu et al., 2008)                                |
| PDK1    | -3.33302 | 0.000682 | (Park et al., 2009)                                      |
| PTK2    | -1.52327 | 0.005149 | (Chapman & Houtman, 2014)                                |
| PTK2    | -1.61764 | 0.007128 |                                                          |
| PTK2    | -1.6481  | 0.009241 |                                                          |
| PTK2    | -1.68791 | 0.009581 |                                                          |
| PTK2    | -1.62097 | 0.009793 |                                                          |
| PTK2    | -1.65695 | 0.010397 |                                                          |
| PTK2    | -1.59607 | 0.01093  |                                                          |
| PTK2    | -1.56553 | 0.011116 |                                                          |
| PTK2    | -1.71743 | 0.011116 |                                                          |
| PTK2    | -1.69744 | 0.011898 |                                                          |
| PTK2    | -1.49245 | 0.012666 |                                                          |
| PTK2    | -1.49781 | 0.012982 |                                                          |
| PTK2    | -1.58823 | 0.013563 |                                                          |
| PTK2    | -1.69485 | 0.014341 |                                                          |
| PTK2    | -1.3979  | 0.014885 |                                                          |
| PTK2    | -1.68131 | 0.017314 |                                                          |
| PTK2    | -1.51958 | 0.024539 |                                                          |
| PTK2    | -1.68575 | 0.025684 |                                                          |
| PTK2    | -1.5538  | 0.029796 |                                                          |
| PTPRF   | 1.359712 | 0.043908 | (Stanford et al., 2012)                                  |
| RASGRP1 | -1.5732  | 0.021548 | (Ortega-Francisco et al., 2017)                          |
| RYR3    | -1.36329 | 0.027199 | (Thakur, Dadsetan, & Fomina, 2012)                       |
| SELL    | -2.54407 | 0.006664 | (Sallusto et al., 2004, 1999)                            |
| SEMA4D  | -1.99565 | 0.006741 | (Ortega-Francisco et al., 2017)                          |
| SEMA4D  | -1.99418 | 0.007128 |                                                          |
| SEMA4D  | -1.98717 | 0.007764 |                                                          |
| SH2D2A  | 1.96342  | 0.029379 | (Sundvold et al., 2000)                                  |

| SH2D2A                                      | 1.606576        | 0.040262     |                                                                |
|---------------------------------------------|-----------------|--------------|----------------------------------------------------------------|
| SIDT1                                       | -2.09569        | 0.000567     | (Brinza et al., 2016b)                                         |
| SIDT1                                       | -2.06479        | 0.000768     |                                                                |
| SPNS2                                       | 1.353609        | 0.023308     | (Ortega-Francisco et al., 2017)                                |
| SPNS2                                       | 1.464658        | 0.027346     |                                                                |
| TCF7                                        | -1.93821        | 0.011123     | (Willinger et al., 2006)                                       |
| TCF7                                        | -1.94776        | 0.01515      |                                                                |
| TCF7                                        | -1.80528        | 0.020589     |                                                                |
| TCF7                                        | -1.88955        | 0.022504     |                                                                |
| TERT                                        | -2.69408        | 0.023411     | (Akbar & Vukmanovic-Stejic, 2007)                              |
| TGFBR3                                      | -1.98545        | 0.012616     | (Ortega-Francisco et al., 2017)                                |
| TGFBR3                                      | -1.92901        | 0.013415     |                                                                |
| TGFBR3                                      | -1.91475        | 0.017404     |                                                                |
| TIAM1                                       | -3.6088         | 0.006198     | (Gerard, van der Kammen, Janssen, Ellenbroek, & Collard, 2009) |
| TIAM1                                       | -3.70851        | 0.006198     |                                                                |
| TIAM1                                       | -3.84106        | 0.006354     |                                                                |
| TIAM1                                       | -3.74174        | 0.006548     |                                                                |
| TIAM1                                       | -3.59794        | 0.009357     |                                                                |
| TIAM1                                       | -3.56771        | 0.010682     |                                                                |
| TLR6                                        | 1.220077        | 0.012397     | (B. Jin, Sun, Yu, Yang, & Yeo, 2012)                           |
| TNFRSF1B                                    | 1.653824        | 0.012724     | (Weng et al., 2012)                                            |
| TNFRSF1B                                    | 1.653824        | 0.012724     |                                                                |
| TNFSF12                                     | 1.197349        | 0.008386     | (Maecker et al., 2005)                                         |
| TNFSF12                                     | 1.076618        | 0.025136     |                                                                |
| TNFSF8                                      | -2.3618         | 0.020589     | (Nishimura et al., 2005)                                       |
| UNC13D                                      | 1.396084        | 0.003248     | (Cichocki et al., 2014)                                        |
| UNC13D                                      | 1.292078        | 0.004564     |                                                                |
| UNC13D                                      | 1.393111        | 0.006727     |                                                                |
| CD8 <sup>+</sup> memory T-cells BM vs Blood |                 |              |                                                                |
| Gene Name                                   | Log fold change | adj. P value | Literature                                                     |
| AIM1L                                       | 1.14699758      | 0.02676089   | (Kumar et al., 2017)                                           |
| ARHGAP18                                    | 1.09097448      | 0.04097176   | (Kumar et al., 2017)                                           |
| BACH2                                       | 1.51395879      | 0.01925728   | (Hu & Chen, 2013b)                                             |
| BACH2                                       | 1.32623424      | 0.04896827   |                                                                |
| CCR9                                        | 2.62992229      | 0.00689682   | (Cassani et al., 2011)                                         |
| CD63                                        | 1.57277259      | 0.02149123   | (Sincock, Mayrhofer, & Ashman, 1997)                           |
| CD63                                        | 1.6041947       | 0.01873893   |                                                                |
| CD63                                        | 1.98179779      | 0.01986202   |                                                                |
| CLCF1                                       | 1.16043424      | 0.03399945   | (Kumar et al., 2017)                                           |
| DYSF                                        | 1.667159        | 0.04809178   | (Kumar et al., 2017)                                           |
| DYSF                                        | 1.70676921      | 0.04946483   |                                                                |
| DYSF                                        | 1.73281361      | 0.04731802   |                                                                |
| DYSF                                        | 1.78459569      | 0.03399945   |                                                                |
| DYSF                                        | 1.79339487      | 0.03552692   |                                                                |
| DYSF                                        | 1.7994008       | 0.03033491   |                                                                |
| DYSF                                        | 1.79995237      | 0.03924864   |                                                                |
| DYSF                                        | 1.8006521       | 0.03592599   |                                                                |
| DYSF                                        | 1.80346625      | 0.0289546    |                                                                |
| DYSF                                        | 1.81189529      | 0.03399945   |                                                                |
| DYSF                                        | 1.82852166      | 0.02721505   |                                                                |
| DYSF                                        | 1.82914859      | 0.03513176   |                                                                |
| DYSF                                        | 1.85341807      | 0.04465047   |                                                                |
| DYSF                                        | 1.85905908      | 0.03694871   |                                                                |
| DYSF                                        | 1.88247411      | 0.02676089   |                                                                |
| DYSF                                        | 1.88277163      | 0.03112209   |                                                                |
| DYSF                                        | 1.8866629       | 0.03140228   |                                                                |
| FAM102A                                     | 1.03466669      | 0.04480112   | (Kumar et al., 2017)                                           |
| FAM129A                                     | 1.23756442      | 0.03880919   | (Kumar et al., 2017)                                           |
| FAM65B                                      | 1.41933439      | 0.03320681   | (Kumar et al., 2017)                                           |
| GPR25                                       | 2.71953101      | 0.01706119   | (Kumar et al., 2017)                                           |
| HIP1                                        | 1.26020867      | 0.01403986   | (Kumar et al., 2017)                                           |
| HIP1                                        | 1.26383191      | 0.01085178   |                                                                |
| HIP1                                        | 1.28115137      | 0.00130614   |                                                                |
| IFNGR1                                      | 1.23838062      | 0.04262082   | (Kumar et al., 2017)                                           |
| IFNGR1                                      | 1.2977877       | 0.03079968   |                                                                |

|          |            |            |                           |
|----------|------------|------------|---------------------------|
| KLF2     | 1.39284657 | 0.02705716 | (Kumar et al., 2017)      |
| OCRL     | 1.38165747 | 0.02985422 | (Kumar et al., 2017)      |
| PPFIBP2  | 1.65867654 | 0.01757218 | (Kumar et al., 2017)      |
| RAP1GAP2 | 1.22722779 | 0.0449822  | (Kumar et al., 2017)      |
| RAP1GAP2 | 1.20028036 | 0.04866786 |                           |
| RASA3    | 1.60345786 | 0.00524516 | (Kumar et al., 2017)      |
| RASA3    | 1.56944764 | 0.0086063  |                           |
| RASA3    | 1.53848845 | 0.0091894  |                           |
| RASA3    | 1.52353461 | 0.00874084 |                           |
| RASGRP2  | 1.13014705 | 0.01312975 | (Kumar et al., 2017)      |
| RASSF3   | 1.27620496 | 0.01536454 | (Kumar et al., 2017)      |
| RASSF4   | 1.19424201 | 0.00474526 |                           |
| RASSF4   | 1.24669139 | 0.00471071 |                           |
| RASSF4   | 1.35343455 | 0.00524516 |                           |
| RASSF4   | 1.41585924 | 0.00204417 |                           |
| SIPR1    | 1.91192176 | 0.04618508 | (Okhrimenko et al., 2014) |
|          | 1.86101968 | 0.04950476 |                           |
| SLCO3A1  | 2.01749058 | 0.03140228 | (Kumar et al., 2017)      |
| SLCO3A1  | 1.68061642 | 0.00212074 |                           |
| SPHK1    | 1.63389017 | 0.00267473 | (Yamanaka et al., 2004)   |
| SPHK1    | 1.71277563 | 0.00202112 |                           |
| SPHK1    | 1.7733981  | 0.00042174 |                           |
| SPHK1    | 1.87209887 | 0.00128658 |                           |
| SPHK1    | 1.87624265 | 0.00078737 |                           |
| SSBP3    | 1.42170563 | 0.00871699 | (Kumar et al., 2017)      |
| SSBP3    | 1.40698106 | 0.00434456 |                           |
| TGFBI    | 2.4996392  | 0.01862216 | (Kumar et al., 2017)      |

- Akbar, A. N., and M. Vukmanovic-Stejic. 2007. "Telomerase in T Lymphocytes: Use It and Lose It?" *The Journal of Immunology* 178(11): 6689–94.
- Arsenio, Janilyn et al. 2014. "Early Specification of CD8+ T Lymphocyte Fates during Adaptive Immunity Revealed by Single-Cell Gene-Expression Analyses." *Nature Immunology* 15(4): 365–72.
- Bachmann, M F, M Barner, and M Kopf. 1999. "CD2 Sets Quantitative Thresholds in T Cell Activation." *The Journal of experimental medicine* 190(10): 1383–92.
- Bhattacharyya, Mitra et al. 2017. "Regulation of CD4 T Cells and Their Effects on Immunopathological Inflammation Following Viral Infection." *Immunology* 152(2): 328–43.
- Brinza, Lilia et al. 2016a. "Immune Signatures of Protective Spleen Memory CD8 T Cells." *Scientific Reports* 6(July): 1–12.
- Cassani, Barbara et al. 2011. "Gut-Tropic T Cells That Express Integrin  $\alpha\beta 7$  and CCR9 Are Required for Induction of Oral Immune Tolerance in Mice." *Gastroenterology* 141(6): 2109–18.
- Chandrasekaran, Uma. 2010. "Phospholipase D Signaling in T Cells."
- Chapman, Nicole M., and Jon C. D. Houtman. 2014. "Functions of the FAK Family Kinases in T Cells: Beyond Actin Cytoskeletal Rearrangement." *Immunologic Research* 59(1–3): 23–34.
- Cichocki, Frank et al. 2014. "Transcriptional Regulation of Munc13-4 Expression in Cytotoxic Lymphocytes Is Disrupted by an Intronic Mutation Associated with a Primary Immunodeficiency." *The Journal of Experimental Medicine* 211(6): 1079–91.
- Cleary, A. M. et al. 2003. "Impaired Accumulation and Function of Memory CD4 T Cells in Human IL-12 Receptor 1 Deficiency." *The Journal of Immunology* 170(1): 597–603.
- Gerard, A. et al. 2009. "The Rac Activator Tiam1 Controls Efficient T-Cell Trafficking and Route of Transendothelial Migration." *Blood* 113(24): 6138–47.
- Grigoryev, Y. A. et al. 2011. "MicroRNA Regulation of Molecular Networks Mapped by Global MicroRNA, mRNA, and Protein Expression in Activated T Lymphocytes." *The Journal of Immunology* 187(5): 2233–43.
- Haining, W. N. et al. 2008. "Identification of an Evolutionarily Conserved Transcriptional Signature of CD8 Memory Differentiation That Is Shared by T and B Cells." *The Journal of Immunology* 181(3): 1859–68.
- Holmes, S., M. He, T. Xu, and P. P. Lee. 2005. "Memory T Cells Have Gene Expression Patterns Intermediate between Naive and Effector." *Proceedings of the National Academy of Sciences* 102(15): 5519–23.
- Hu, Guangan, and Jianzhu Chen. 2013a. "A Genome-Wide Regulatory Network Identifies Key Transcription Factors for Memory CD8+ T-Cell Development." *Nature Communications* 4(7): 1400–1414.
- Ishihara, Sayaka et al. 2015. "Dual Functions of Rap1 Are Crucial for T-Cell Homeostasis and Prevention of Spontaneous Colitis." *Nature Communications* 6: 1–16.
- Jago, C. B. et al. 2004. "Differential Expression of CTLA-4 among T Cell Subsets." *Clinical and Experimental Immunology* 136(3): 463–71.
- Jenner, R. G. et al. 2009. "The Transcription Factors T-Bet and GATA-3 Control Alternative Pathways of T-Cell Differentiation through a Shared Set of Target Genes." *Proceedings of the National Academy of Sciences* 106(42): 17876–81.
- Jin, Bo et al. 2012. "The Effects of TLR Activation on T-Cell Development and Differentiation." *Clinical and Developmental Immunology* 2012(Figure 1).
- Jin, Wei, Mikyoung Chang, and Shao Cong Sun. 2012. "Peli: A Family of Signal-Responsive E3 Ubiquitin Ligases Mediating TLR Signaling and T-Cell Tolerance." *Cellular and Molecular Immunology* 9(2): 113–22.
- Kumar, Brahma V. et al. 2017. "Human Tissue-Resident Memory T Cells Are Defined by Core Transcriptional and Functional Signatures in Lymphoid and Mucosal Sites." *Cell Reports* 20(12): 2921–34.

- Lavorgna, Alfonso, Masao Matsuoka, and Edward William Harhaj. 2014. "A Critical Role for IL-17RB Signaling in HTLV-1 Tax-Induced NF- $\kappa$ B Activation and T-Cell Transformation." *PLoS Pathogens* 10(10): 1–16.
- Lee, Myeong Sup et al. 2004. "Gene Expression Profiles during Human CD4+ T Cell Differentiation." *International Immunology* 16(8): 1109–24.
- Lin, Meei Yun et al. 2005. "A Pivotal Role for the Multifunctional Calcium/ Calmodulin-Dependent Protein Kinase II in T Cells: From Activation to Unresponsiveness." *The Journal of Immunology*: 5583–92.
- Ludford-Menting, Mandy J. et al. 2005. "A Network of PDZ-Containing Proteins Regulates T Cell Polarity and Morphology during Migration and Immunological Synapse Formation." *Immunity* 22(6): 737–48.
- Maecker, Heather et al. 2005. "TWEAK Attenuates the T transition from Innate to Adaptive Immunity." *Cell* 123(5): 931–44.
- Marshall, Heather D. et al. 2011a. "Differential Expression of Ly6C and T-Bet Distinguish Effector and Memory Th1 CD4+ Cell Properties during Viral Infection." *Immunity* 35(4): 633–46.
- Martinez-Navio, José M. et al. 2011. "Adenosine Deaminase Potentiates the Generation of Effector, Memory, and Regulatory CD4+ T Cells." *Journal of Leukocyte Biology* 89(1): 127–36.
- Martínez, Victor G. et al. 2015. "The BMP Pathway Participates in Human Naive CD4+ T Cell Activation and Homeostasis." *PLoS ONE* 10(6): 1–18.
- Mitchell, Christopher J. et al. 2015. "A Multi-Omic Analysis of Human Naive CD4+ T Cells." *BMC Systems Biology* 9(1): 1–16.
- Myers, Darienne R. et al. 2017. "Tonic LAT-HDAC7 Signals Sustain Nur77 and Irf4 Expression to Tune Naive CD4 T Cells." *Cell Reports* 19(8): 1558–71.
- Nishimura, Hitoshi et al. 2005. "A Novel Role of CD30/CD30 Ligand Signaling in the Generation of Long-Lived Memory CD8+ T Cells." *Journal of Immunology (Baltimore, Md. : 1950)* 175(7): 4627–34.
- Okhrimenko, Anna et al. 2014. "Human Memory T Cells from the Bone Marrow Are Resting and Maintain Long-Lasting Systemic Memory." *Proceedings of the National Academy of Sciences of the United States of America* 111(25): 9229–34.
- Ortega-Francisco, Sandra et al. 2017. "T $\beta$ RIII Is Induced by TCR Signaling and Downregulated in FoxP3+ Regulatory T Cells." *Biochemical and Biophysical Research Communications* 494(1–2): 82–87.
- Park, Sung-gyoo et al. 2009. "Phosphoinositide-Dependent Kinase 1 Integrates T Cell Receptor and CD28 Co-Receptor Signaling to Effect NF- $\kappa$ B Induction and T Cell Activation." *Nature Immunology* 10(2): 158–66.
- Romagnani, S. 1992. "Human TH1 and TH2 Subsets: Regulation of Differentiation and Role in Protection and Immunopathology." *International Archives of Allergy and Immunology* 98(4): 279–85.
- Sallusto, Federica et al. 1999. "Two Subsets of Memory T Lymphocytes with Distinct Homing Potentials and Effector Functions." *Nature* 401(6754): 708–12.
- Sallusto, Federica, Jens Geginat, and Antonio Lanzavecchia. 2004. "Central Memory and Effector Memory T Cell Subsets: Function, Generation, and Maintenance." *Annual review of immunology* 22(1): 745–63.
- Sincock, Paul M., Graham Mayrhofer, and Leonie K. Ashman. 1997. "Localization of the Transmembrane 4 Superfamily (TM4SF) Member PETA-3 (CD151) in Normal Human T Issues: Comparison with CD9, CD63, and  $\alpha$ 5 $\beta$ 1 Integrin." *Journal of Histochemistry & Cytochemistry* 45(4): 515–25.
- Slota, Christina et al. 2015. "Norepinephrine Preferentially Modulates Memory CD8 T Cell Function Inducing Inflammatory Cytokine Production and Reducing Proliferation in Response to Activation." *Brain, Behavior, and Immunity* 46(410): 168–79.
- Spadaro, Olga et al. 2016. "Growth Hormone Receptor Deficiency Protects against Age-Related NLRP3 Inflammasome Activation and Immune Senescence." *Cell Reports* 14(7): 1571–80.
- Srikanth, Sonal et al. 2017. "HHSPublic Access." 9(420): 1–28. <https://www.ncbi.nlm.nih.gov/pmc/articles/PMC5013727/pdf/nihms812852.pdf>.
- Stanford, Stephanie M., Novella Rapini, and Nunzio Bottini. 2012. "Regulation of TCR Signaling by Tyrosine Phosphatases: From Immune Homeostasis to Autoimmunity." *Immunology* 137(1): 1–19.
- Sundvold, V et al. 2000. "T Cell-Specific Adapter Protein Inhibits T Cell Activation by Modulating Lck Activity." *Journal of Immunology (Baltimore, Md. : 1950)* 165(6): 2927–31.
- T hakur, Pratima, Sepehr Dadsetan, and Alla F. Fomina. 2012. "Bidirectional Coupling between Ryanodine Receptors and Ca<sup>2+</sup> Release-Activated Ca<sup>2+</sup> (CRAC) Channel Machinery Sustains Store-Operated Ca<sup>2+</sup> Entry in Human T Lymphocytes." *Journal of Biological Chemistry* 287(44): 37233–44.
- Uhlen, M. et al. 2015. "Tissue-Based Map of the Human Proteome." *Science* 347(6220): 1260419–1260419.
- Wang, Yui Hsi et al. 2006. "Maintenance and Polarization of Human TH2 Central Memory T Cells by Thymic Stromal Lymphopoietin-Activated Dendritic Cells." *Immunity* 24(6): 827–38.
- Weng, Nan-ping, Yasuto Araki, and Kalpana Subedi. 2012. "The Molecular Basis of the Memory T Cell Response: Differential Gene Expression and Its Epigenetic Regulation." *Nature Reviews Immunology* 12(4): 306–15.
- Wenning, Anna S. et al. 2011. "TRP Expression Pattern and the Functional Importance of TRPC3 in Primary Human T-Cells." *Biochimica et Biophysica Acta - Molecular Cell Research* 1813(3): 412–23.
- Willinger, T. et al. 2006. "Human Naive CD8 T Cells Down-Regulate Expression of the WNT Pathway Transcription Factors Lymphoid Enhancer Binding Factor 1 and Transcription Factor 7 (T Cell Factor-1) Following Antigen Encounter In Vitro and In Vivo." *The Journal of Immunology* 176(3): 1439–46.
- Wojciechowski, Sara et al. 2007. "Bim/Bcl-2 Balance Is Critical for Maintaining Naive and Memory T Cell Homeostasis." *The Journal of Experimental Medicine* 204(7): 1665–75.
- Wong, Chunshu et al. 2015. "A Critical Role for the Regulated Wnt–Myc Pathway in Naive T Cell Survival." *The Journal of Immunology* 194(1): 158–67.
- Wu, Zuopeng et al. 2008. "Memory T Cell RNA Rearrangement Programmed by Heterogeneous Nuclear Ribonucleoprotein hnRNPL." *Immunity* 29(6): 863–75.
- Yamanaka, Masayoshi et al. 2004. "Sphingosine Kinase 1 (SPHK1) Is Induced by Transforming Growth Factor- $\beta$  and Mediates TIMP-1 up-Regulation." *Journal of Biological Chemistry* 279(52): 53994–1.
- Yeh, Jung Hua, Sachdev S. Sidhu, and Andrew C. Chan. 2008a. "Regulation of a Late Phase of T Cell Polarity and Effector Functions by Crtam." *Cell* 132(5): 846–59.
- Zhang, Sai, Amale Laouar, Lisa K. Denzin, and Derek B. Sant'Angelo. 2015. "Zbtb16 (PLZF) Is Stably Suppressed and Not Inducible in Non-Innate T Cells via T Cell Receptor-Mediated Signaling." *Scientific Reports* 5(July): 1–13.
